# Supplementary material
Source: ML conference proceedings conference paper supplement (https://openreview.net/forum?id=nfxTpNiSMH)
Supplement: supplementary_material [file motivation.pdf › supplementary material/fig/motivation.pdf]

**Query Text:** "this is a brown leather chair located under the first dark brown table immediately inside the door"

Object 1 is a chair at  $(x_1, y_1, z_1)$ ...  
Object 2 is a table at  $(x_2, y_2, z_2)$ ...

3D-based Model

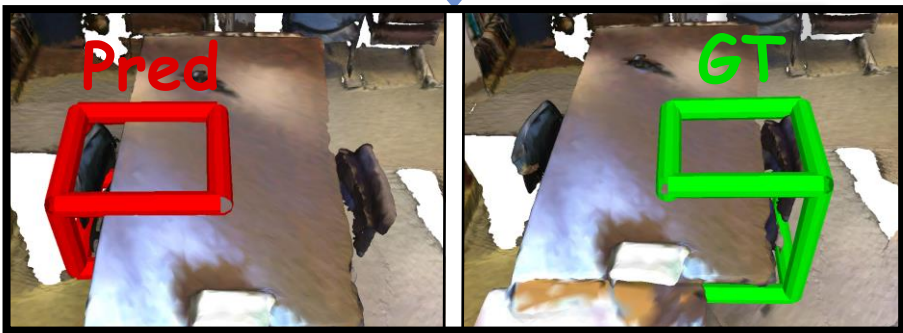

Location: ✓ Attribute: ✗

(a) 3D-based Method

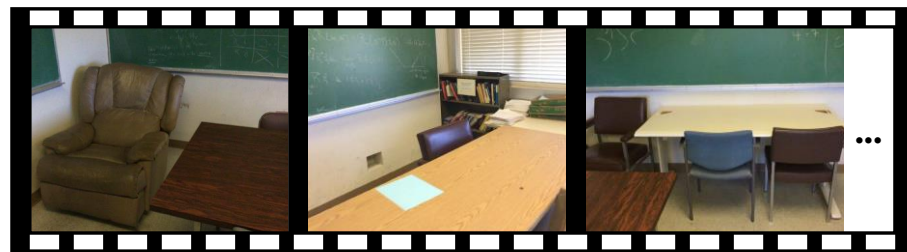

2D-based Model

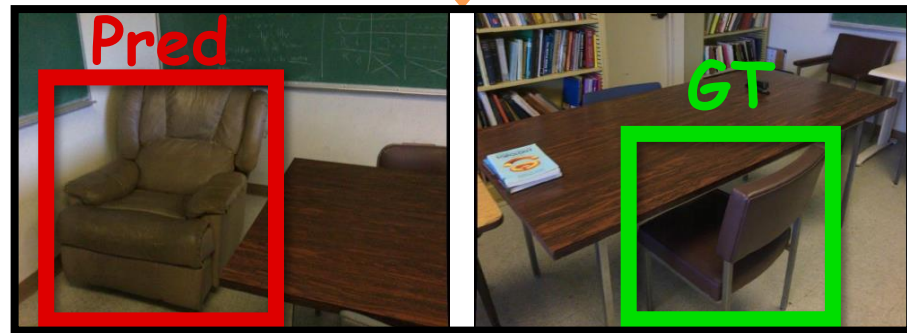

Location: ✗ Attribute: ✓

(b) 2D-based Method

Spatial Localization → Semantic Verification

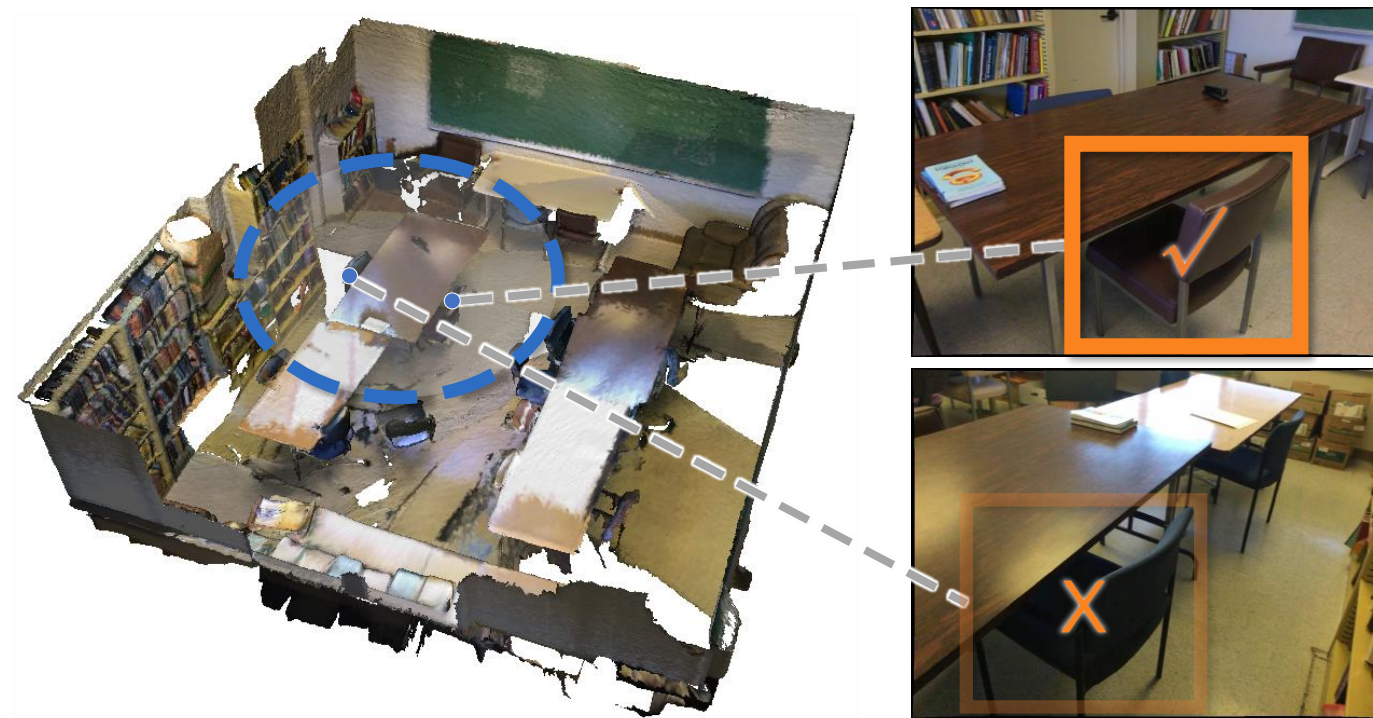

Location: ✓ Attribute: ✓

(c) Our proposed SPAZER
