# Supplementary material
Source: ML conference proceedings conference paper supplement (https://openreview.net/forum?id=nfxTpNiSMH)
Supplement: supplementary_material [file visual_compare.pdf › supplementary material/fig/visual_compare.pdf]

VLM-Grounder

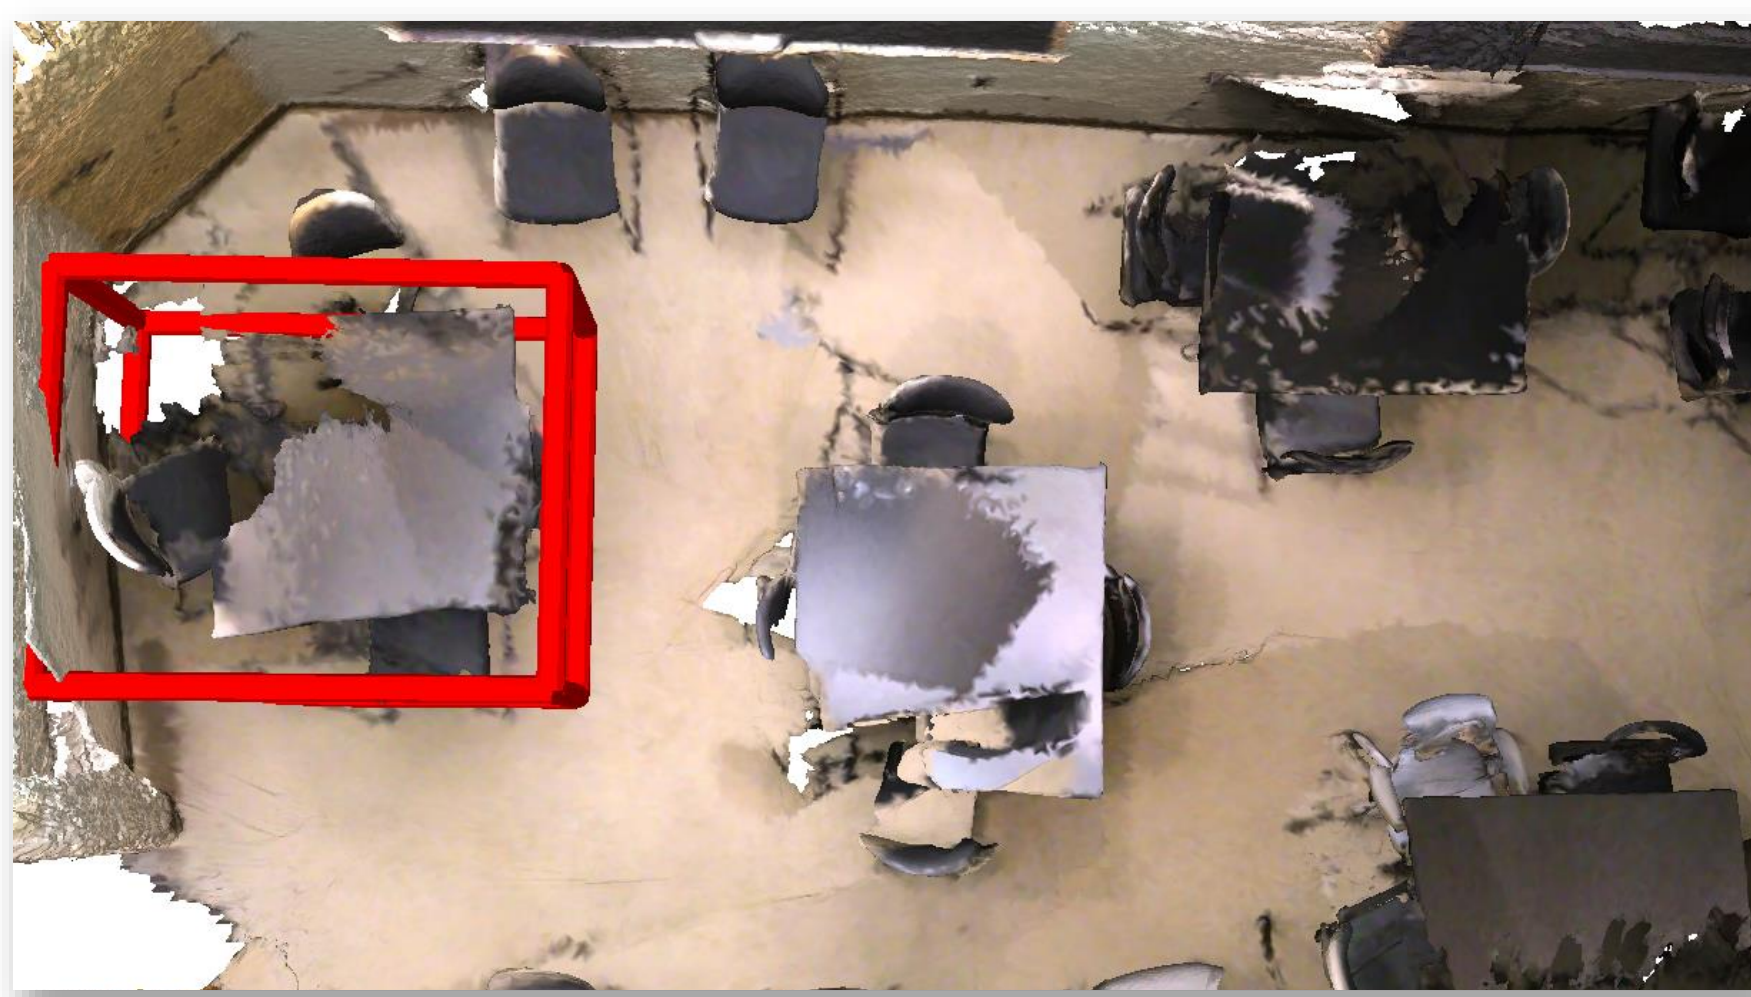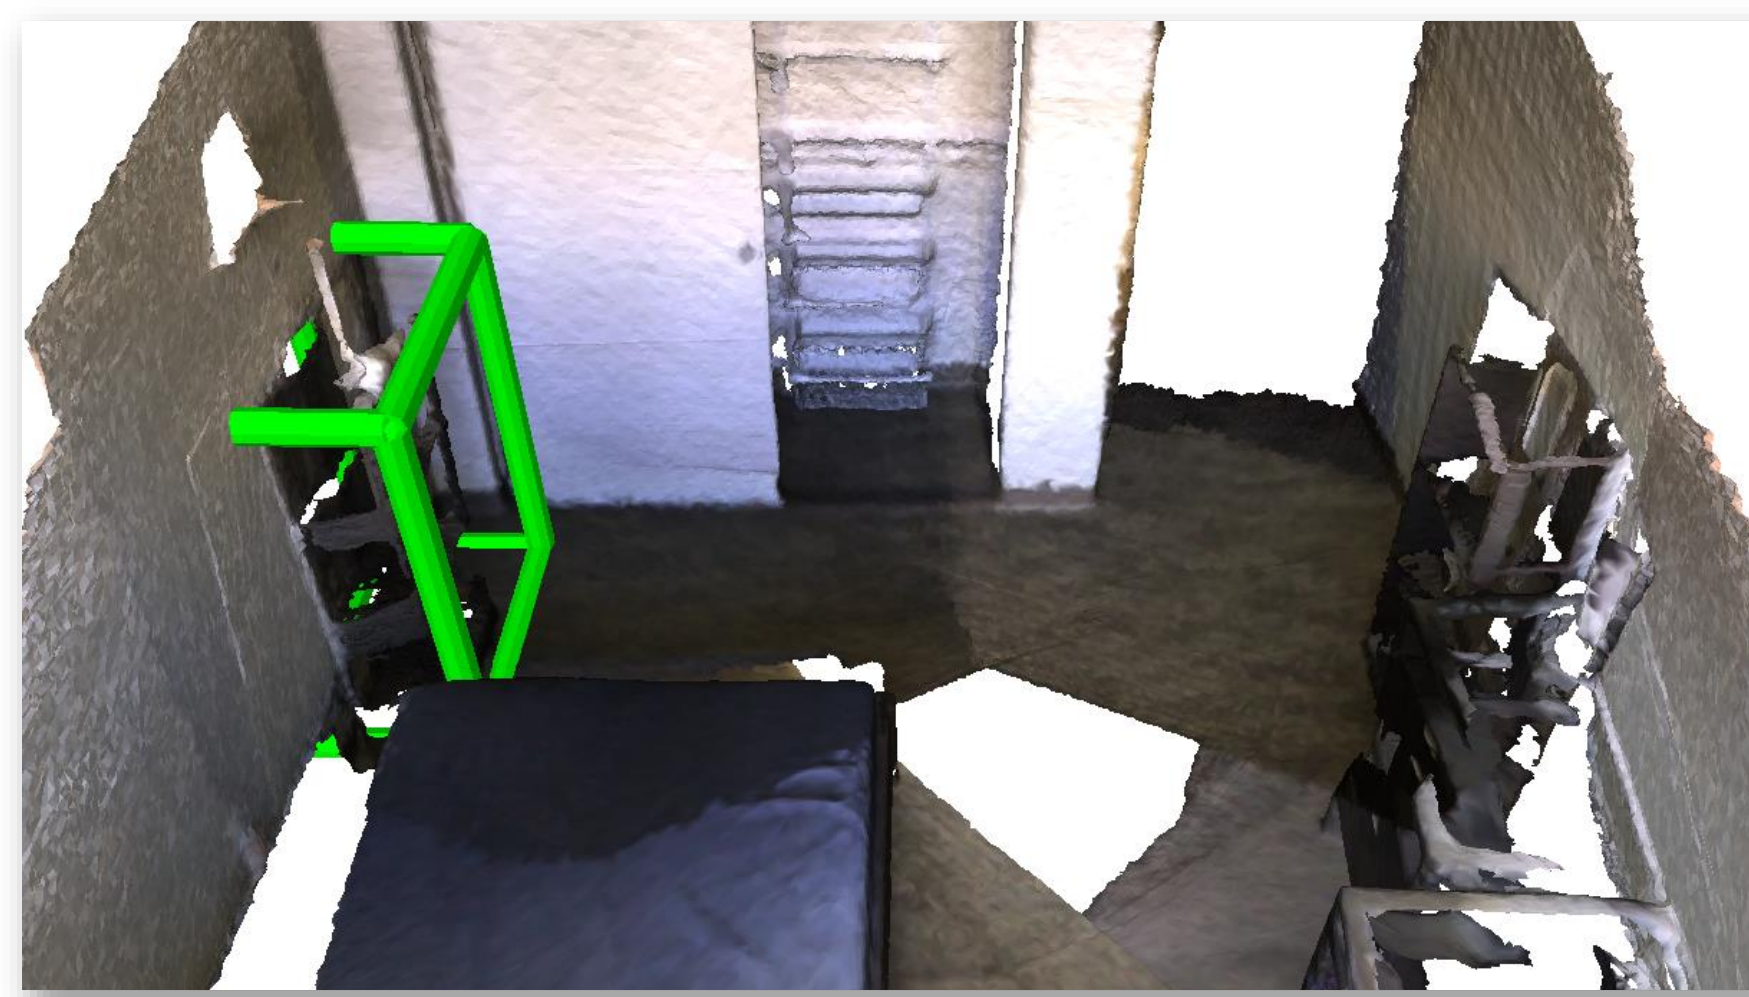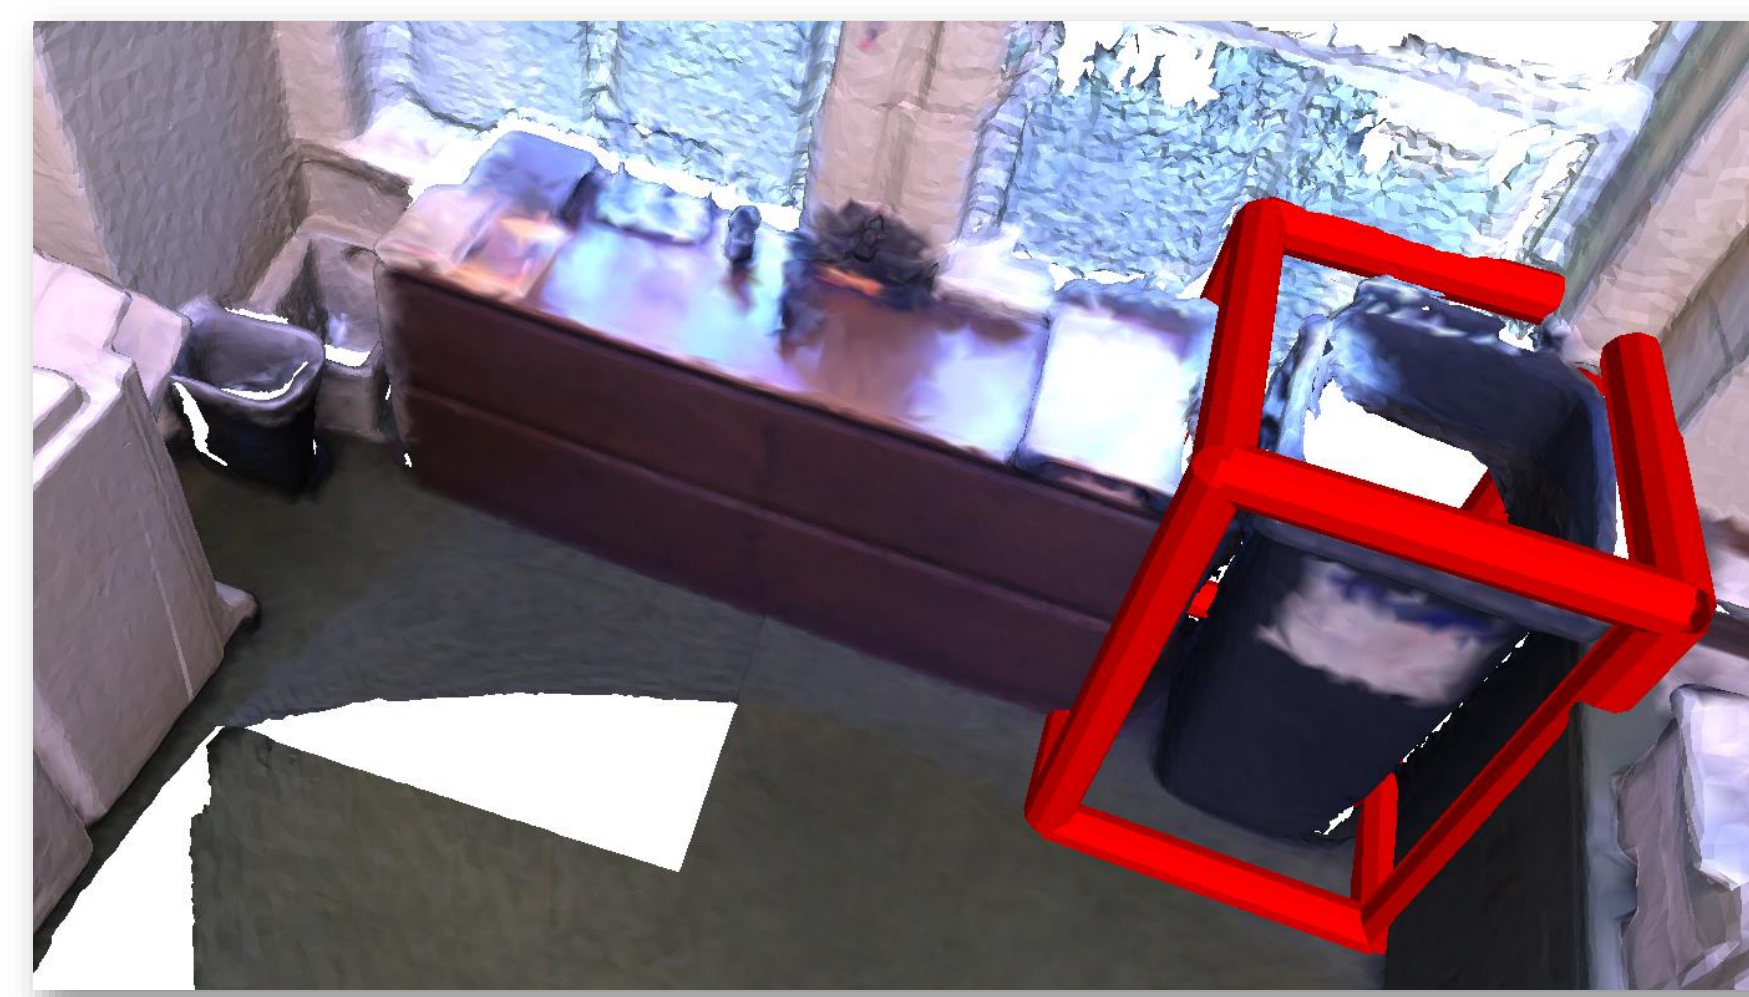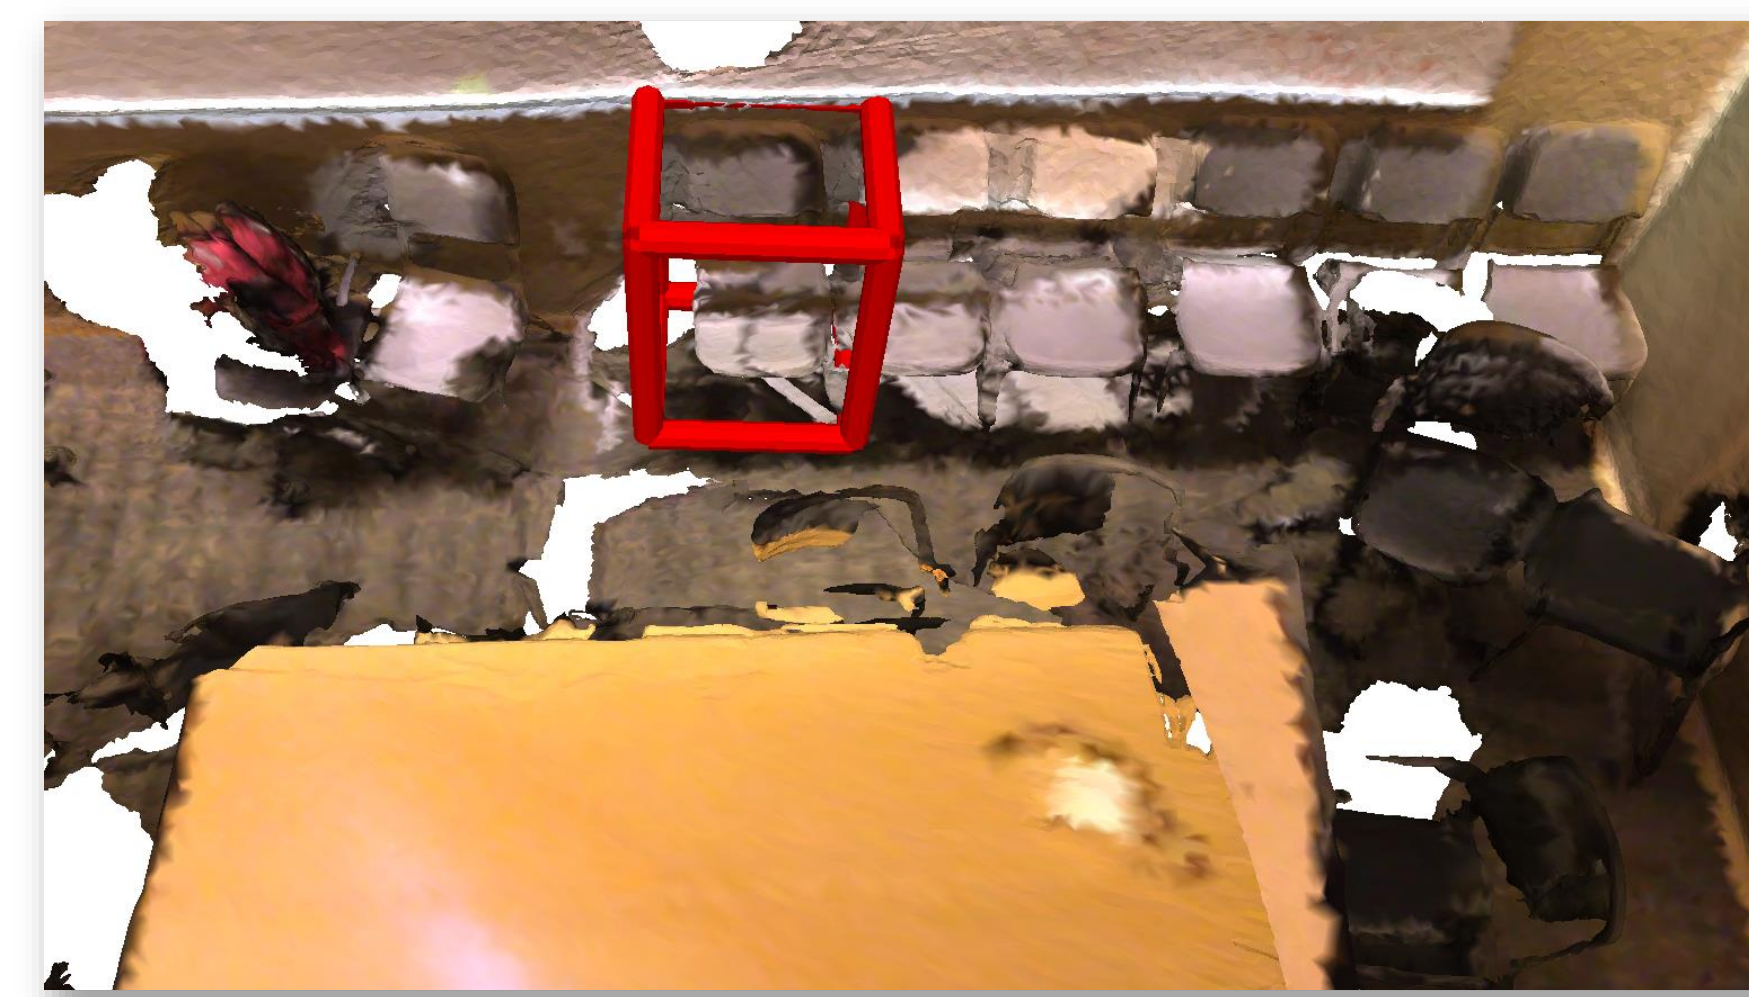

SeeGround

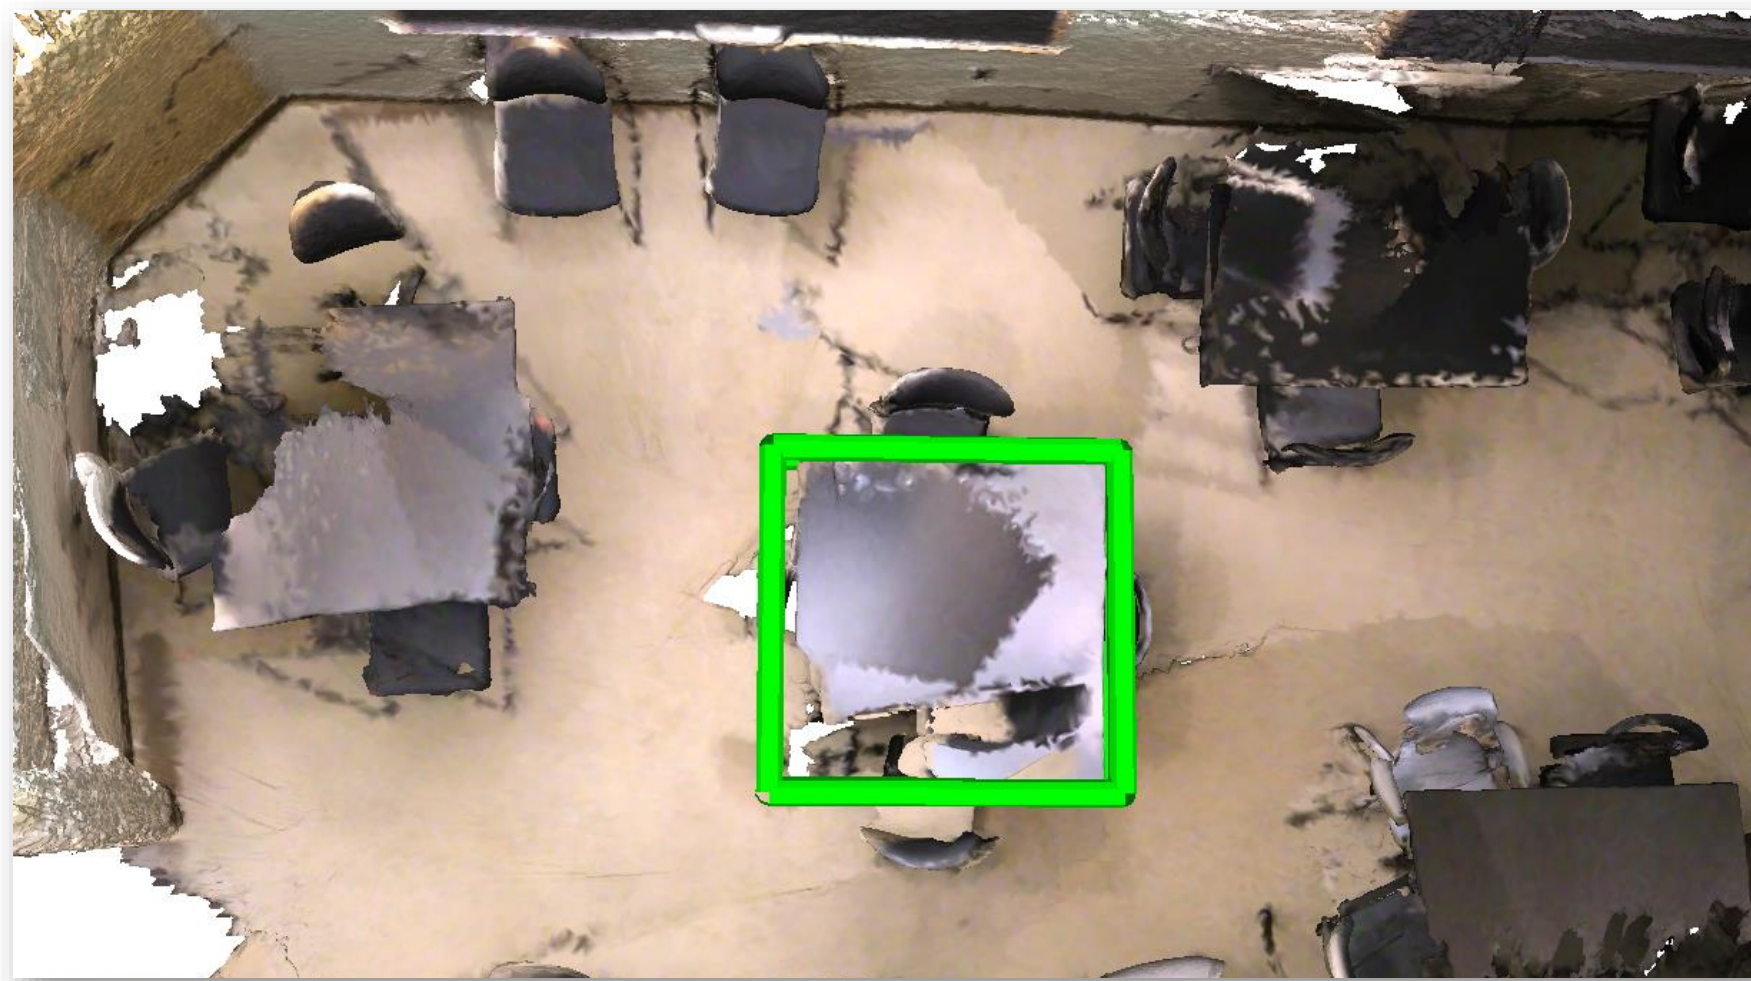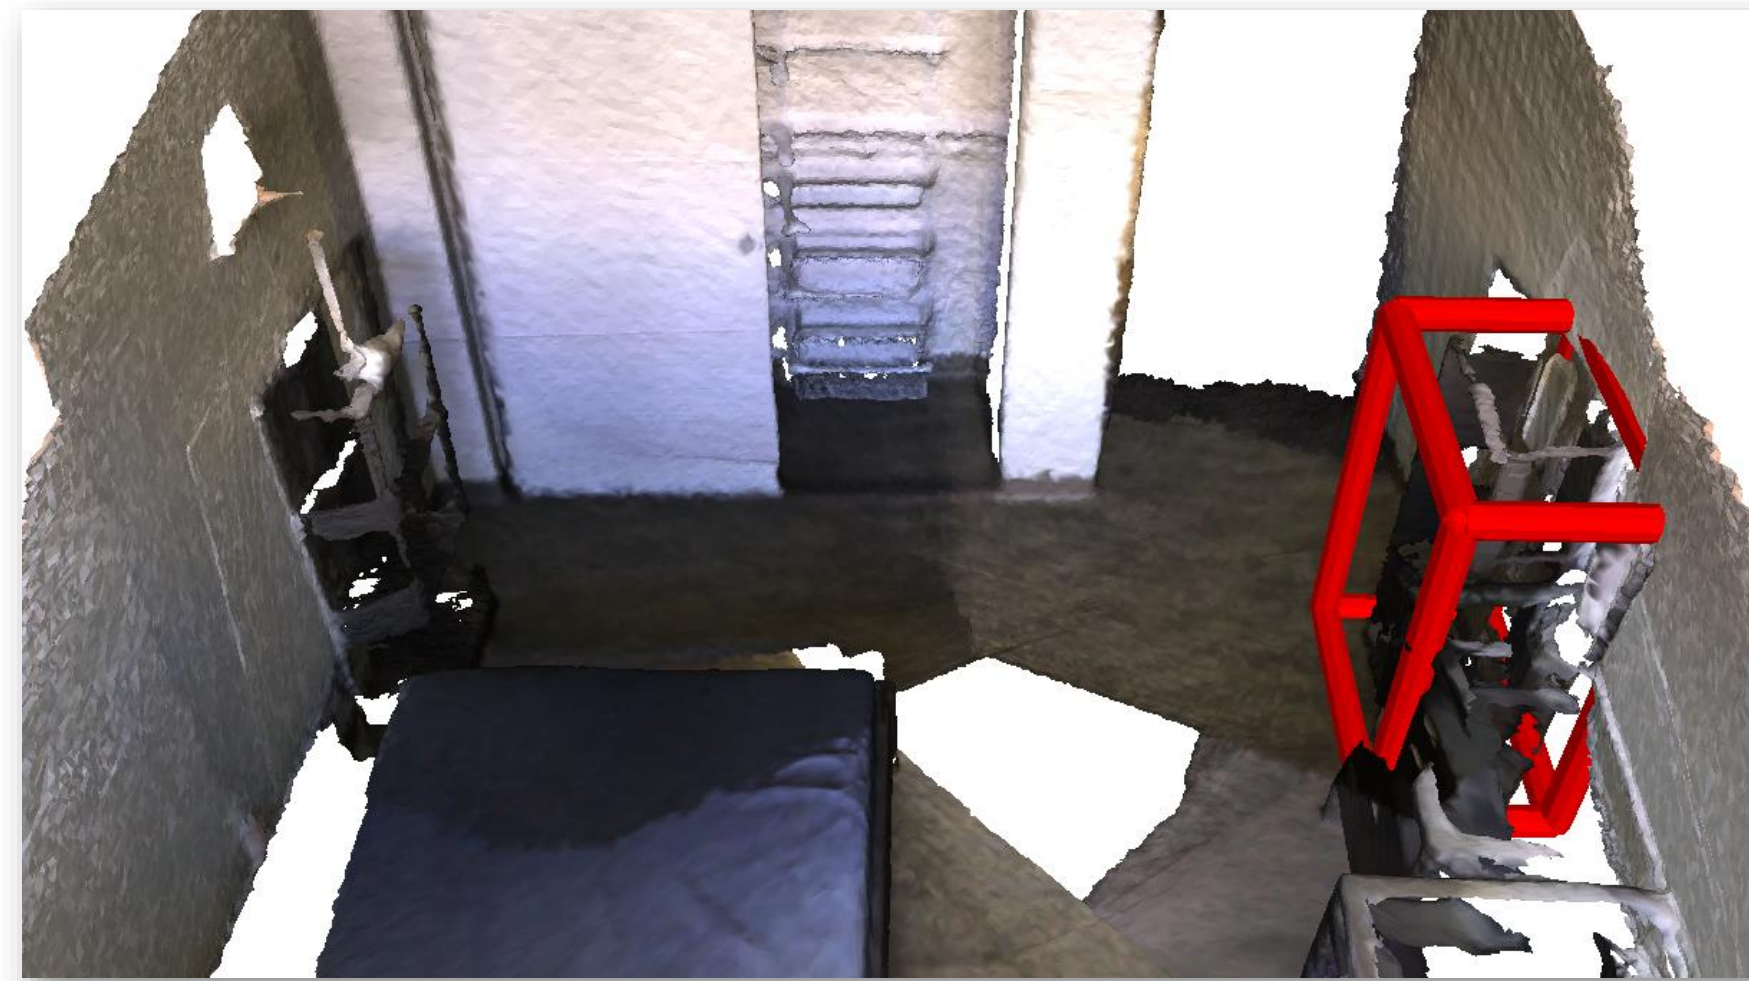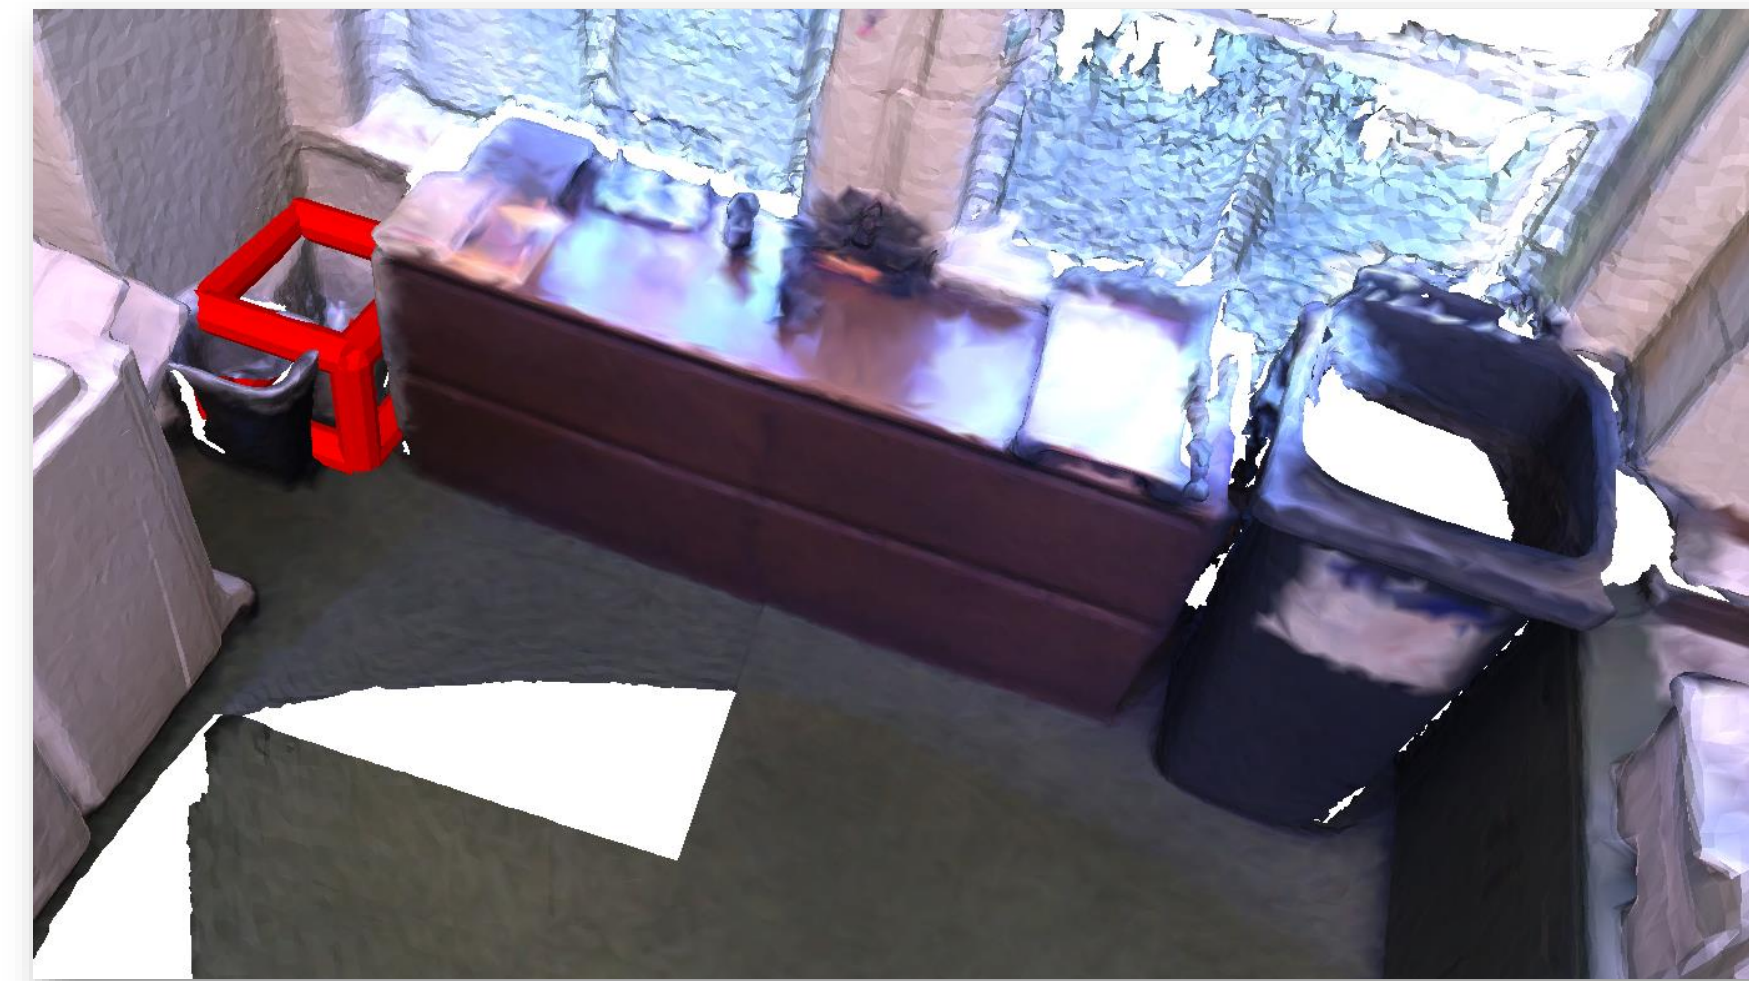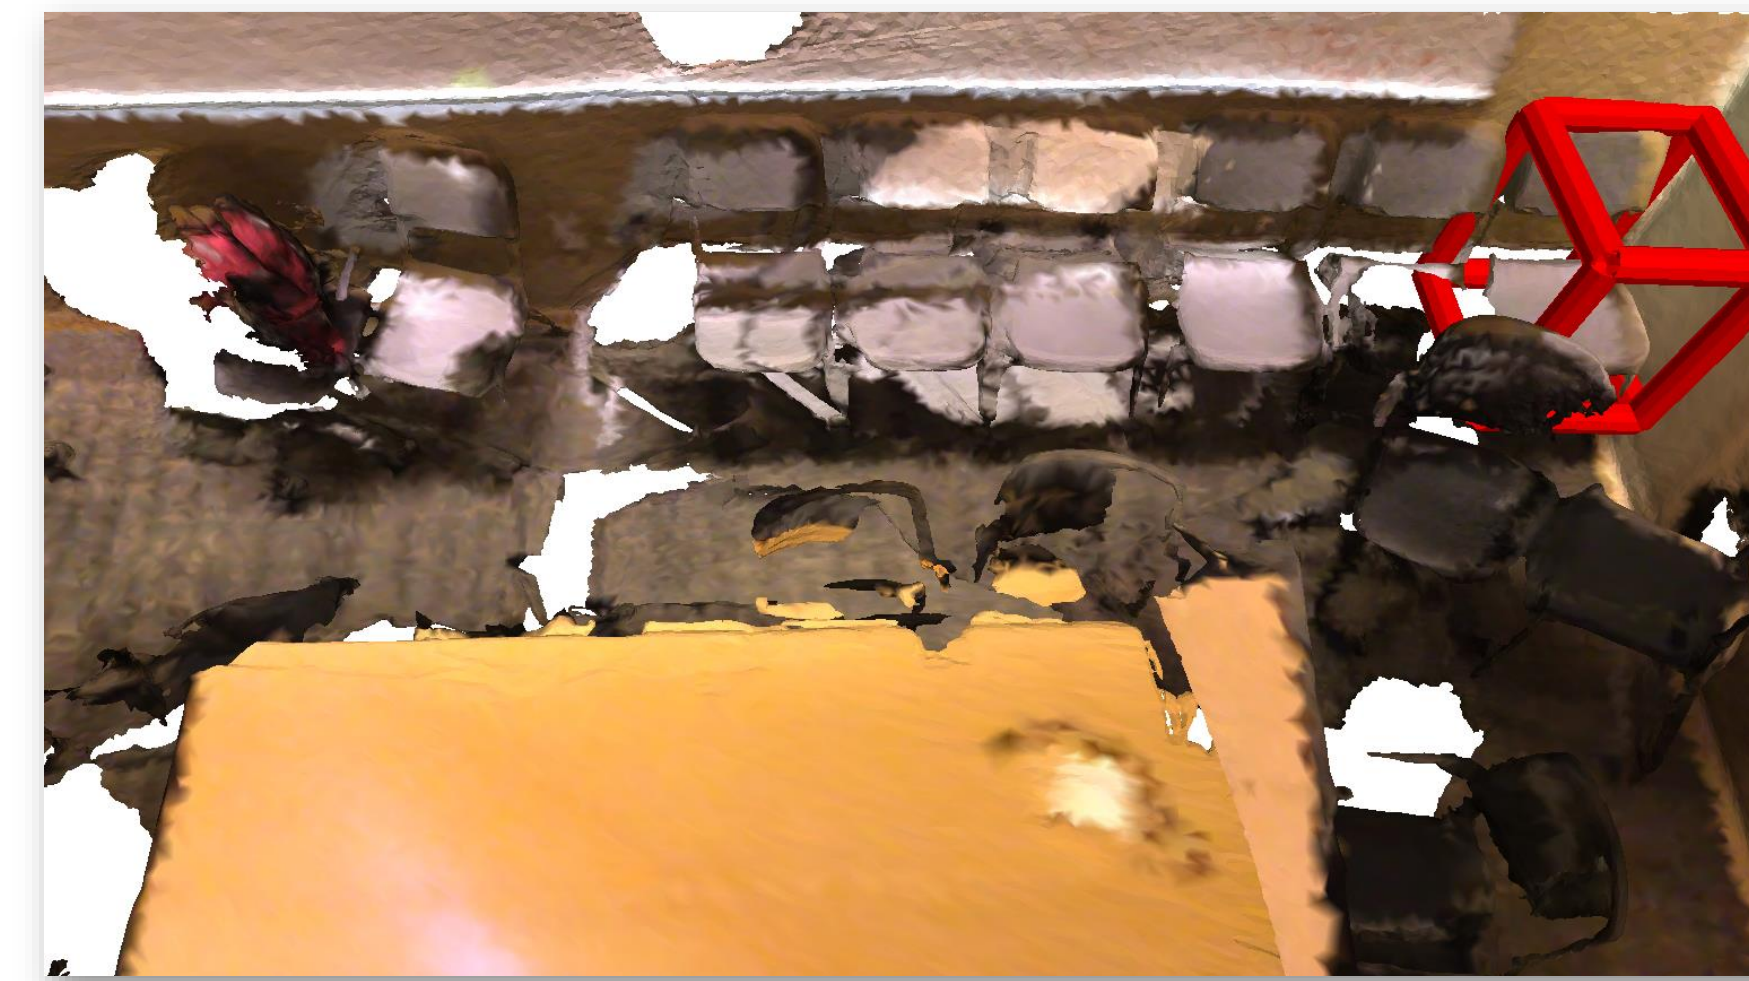

SPAZER (Ours)

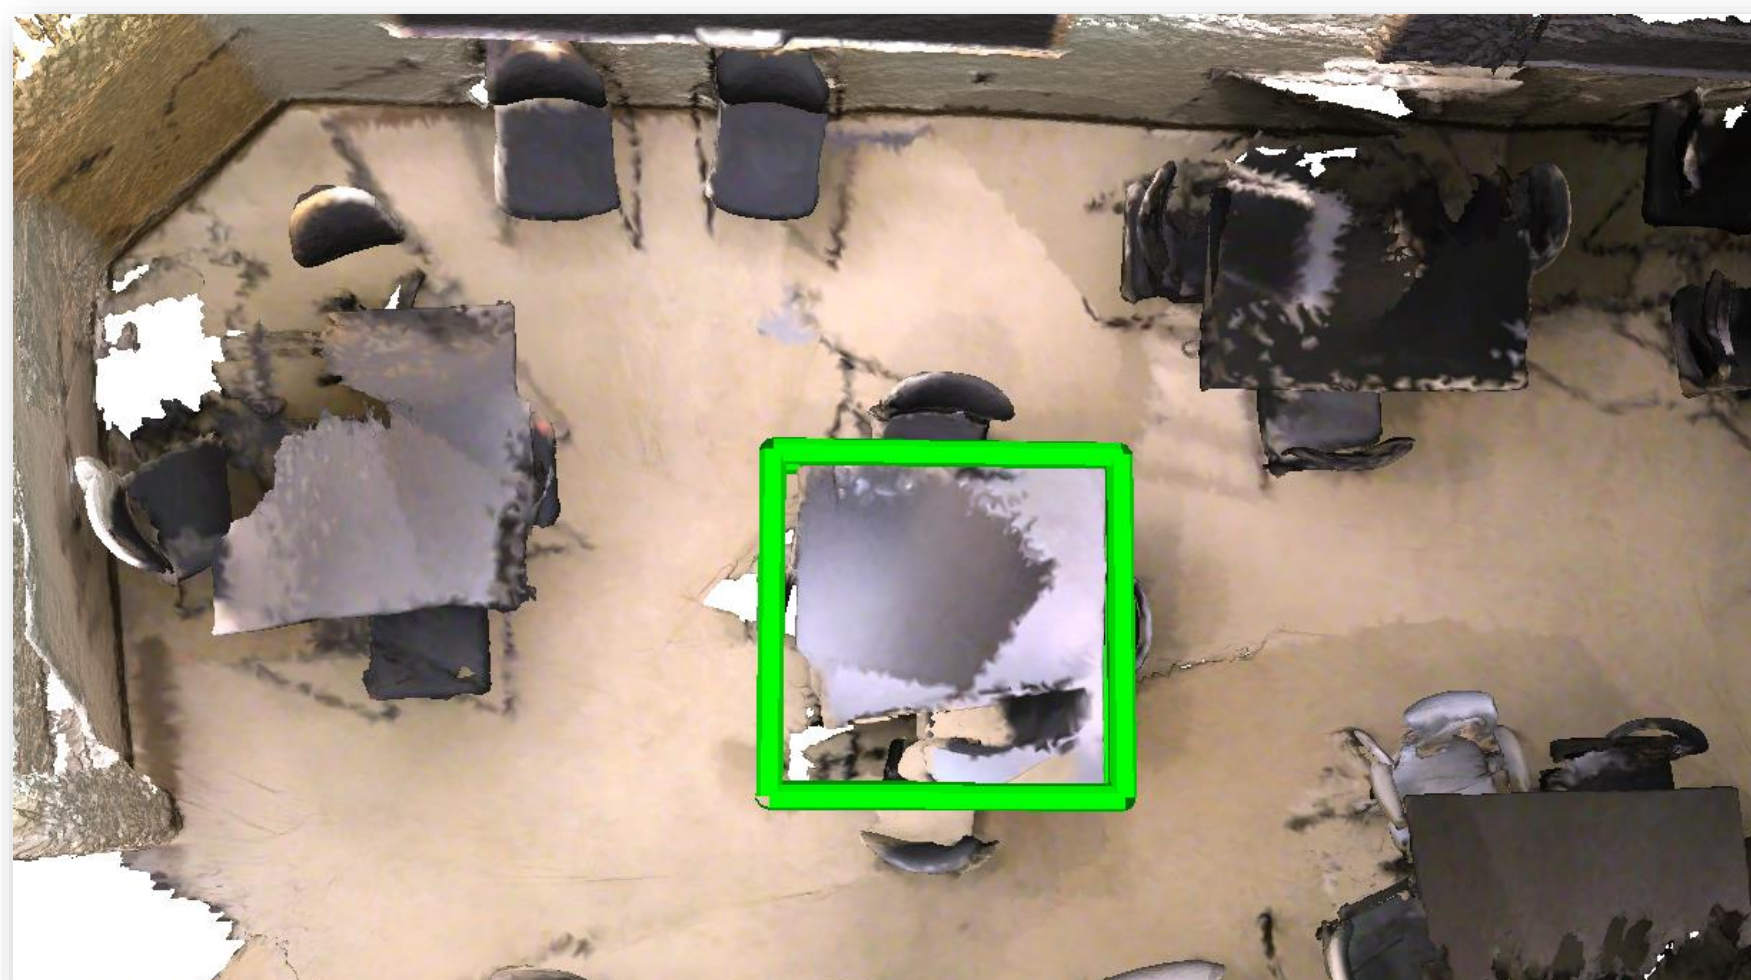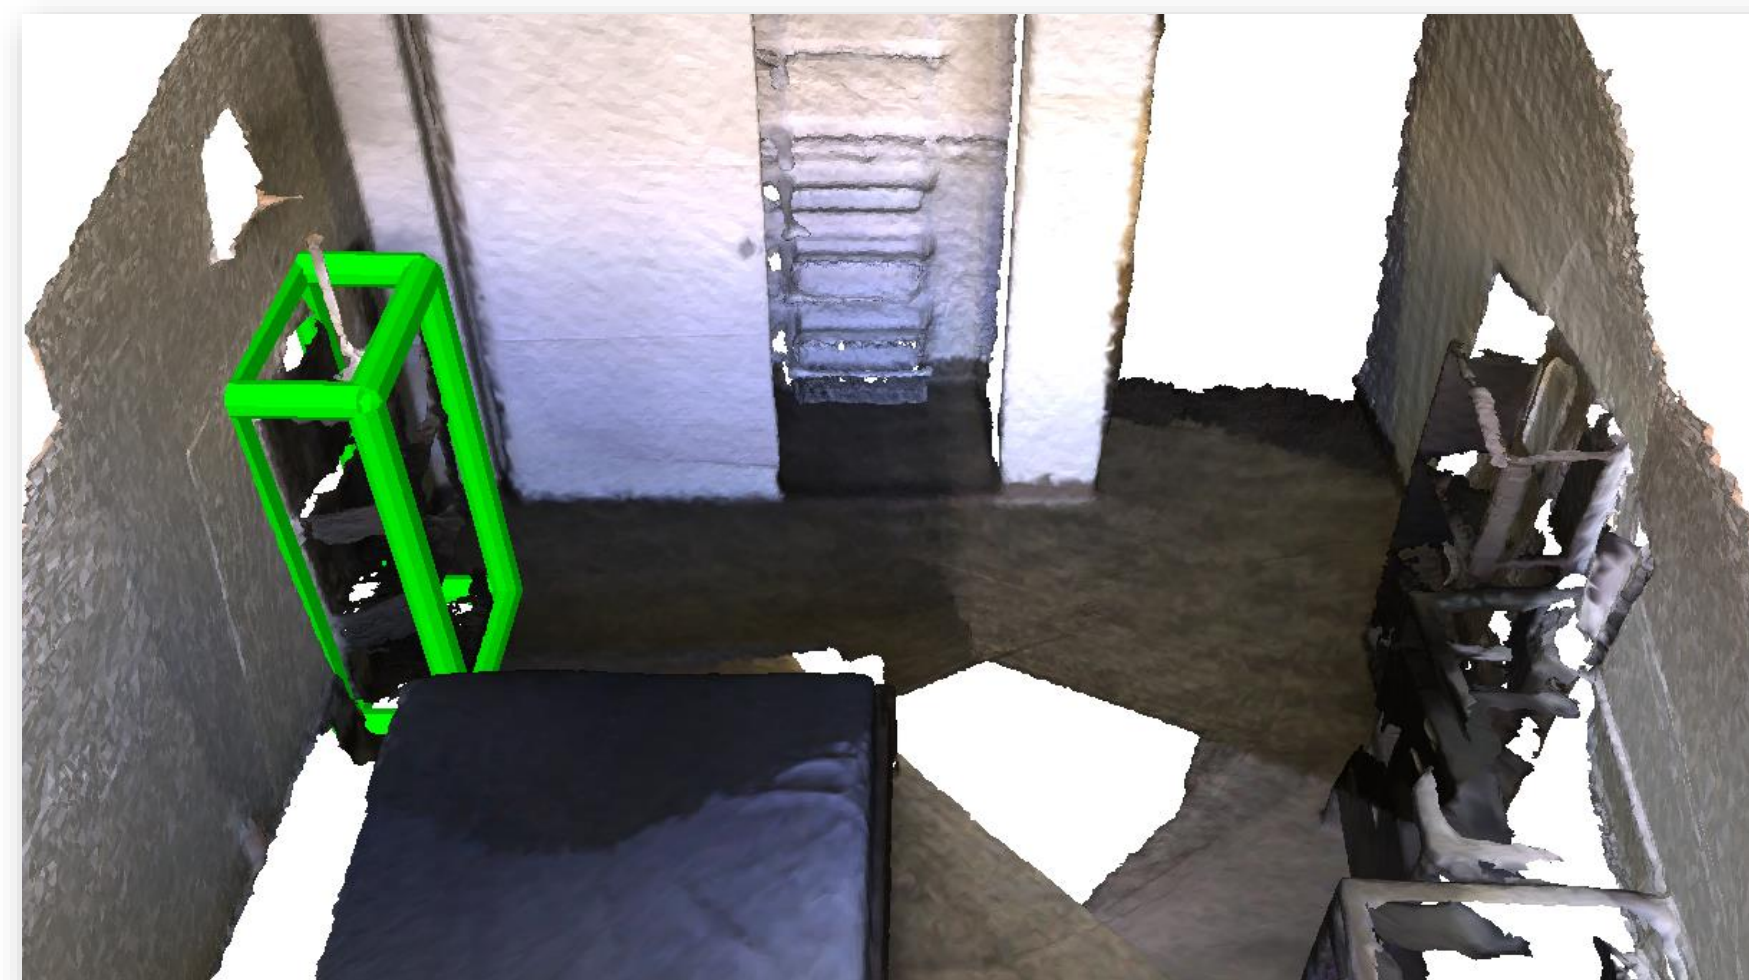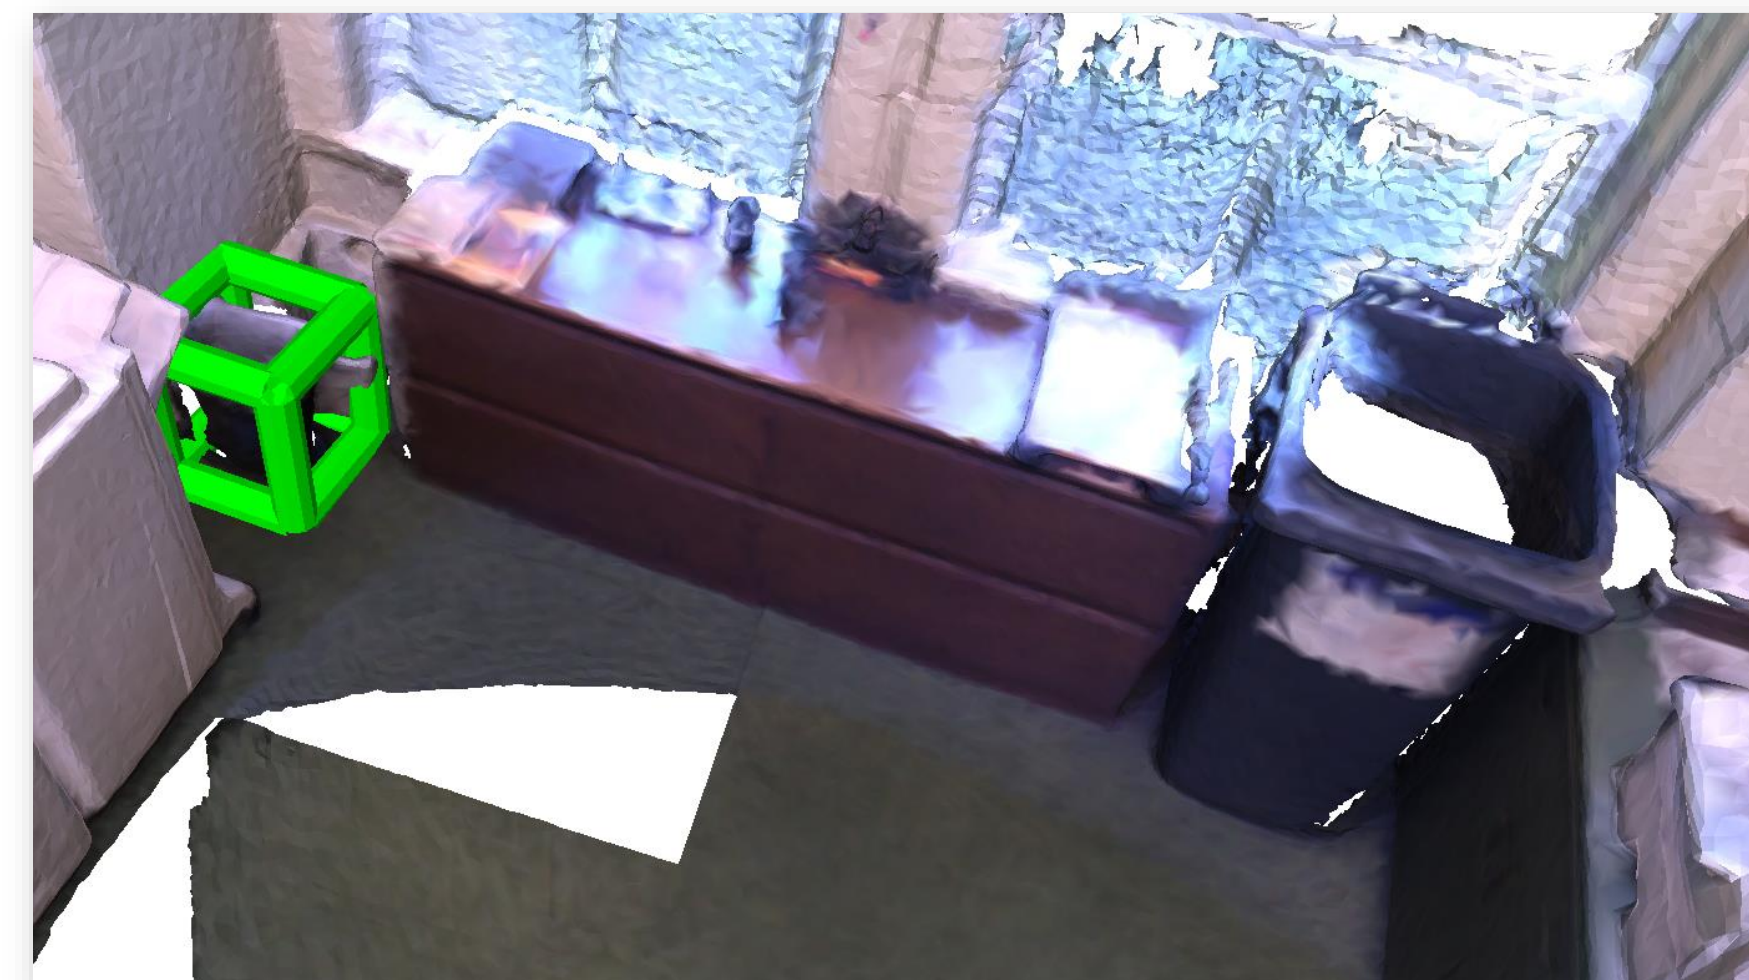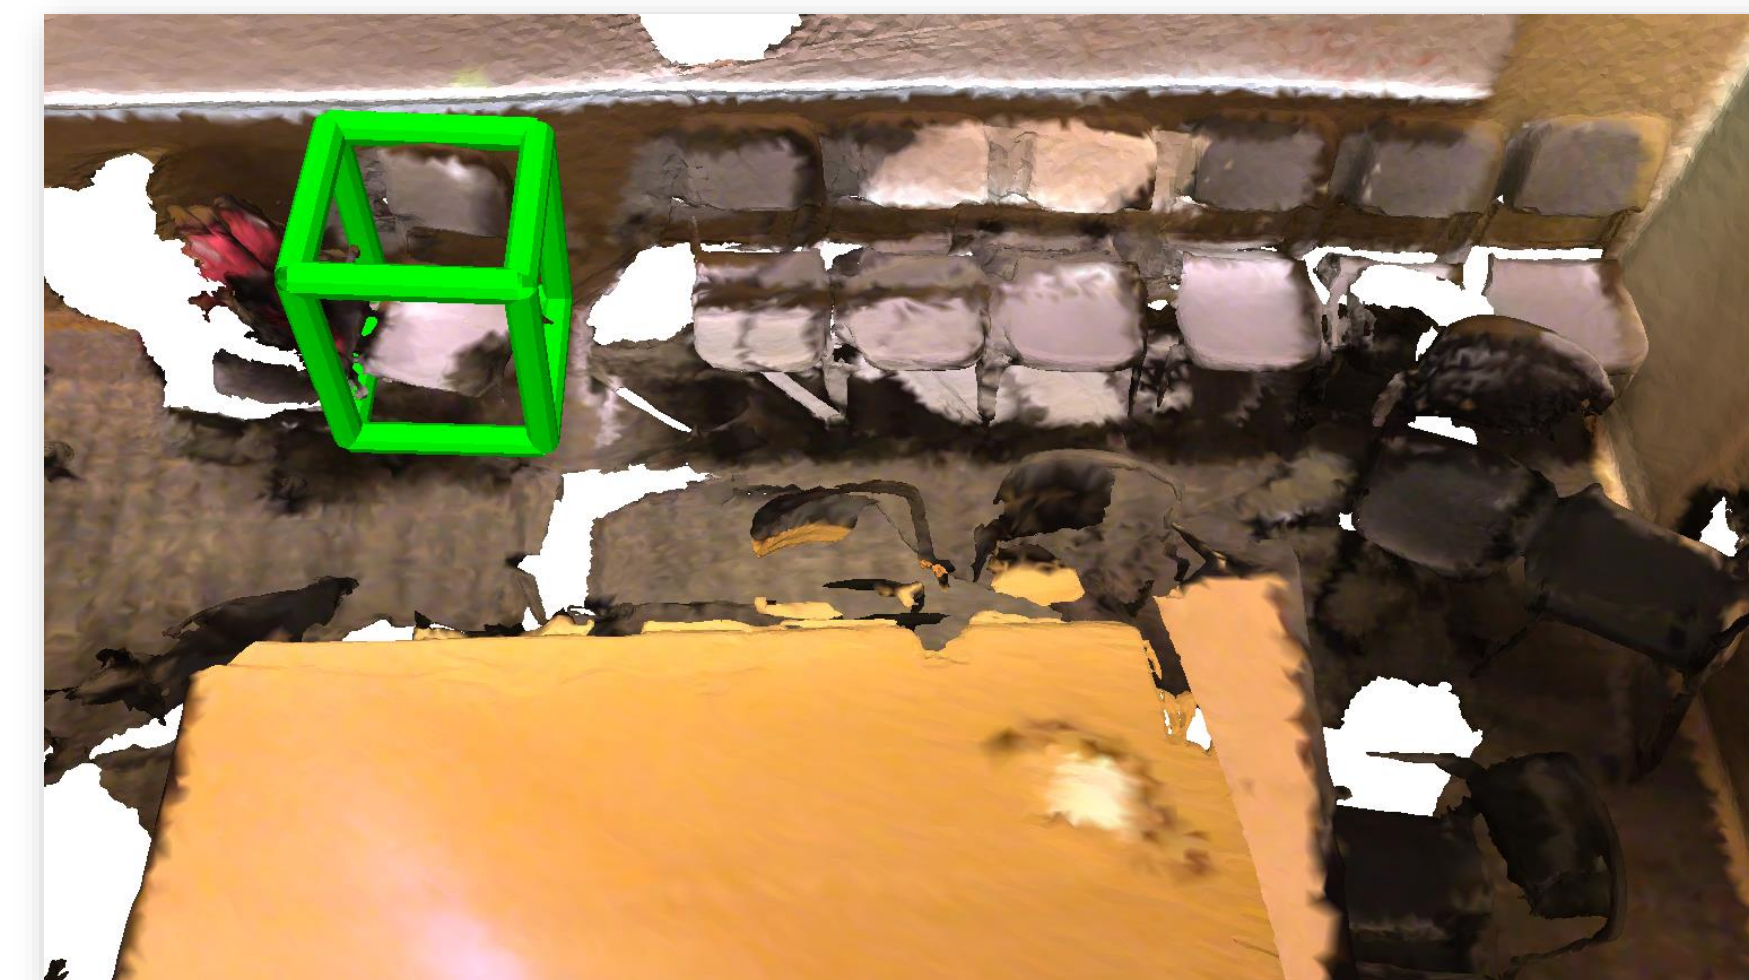

Query

(a) this **table** is in the middle.  
it is square.

(b) the **shelf** is black.  
there is a white lamp  
on top of it.

(c) the **trash can** is on the  
floor to the left of the  
cabinet. there is a small white  
bin beside it, to the right.

(d) a **grey chair** is behind a  
table and black chairs. the grey  
chair is leaning back and has a  
black chair to the right of it.
