# Supplementary material
Source: ML conference proceedings conference paper supplement (https://openreview.net/forum?id=nfxTpNiSMH)

**Ours (3D only)**

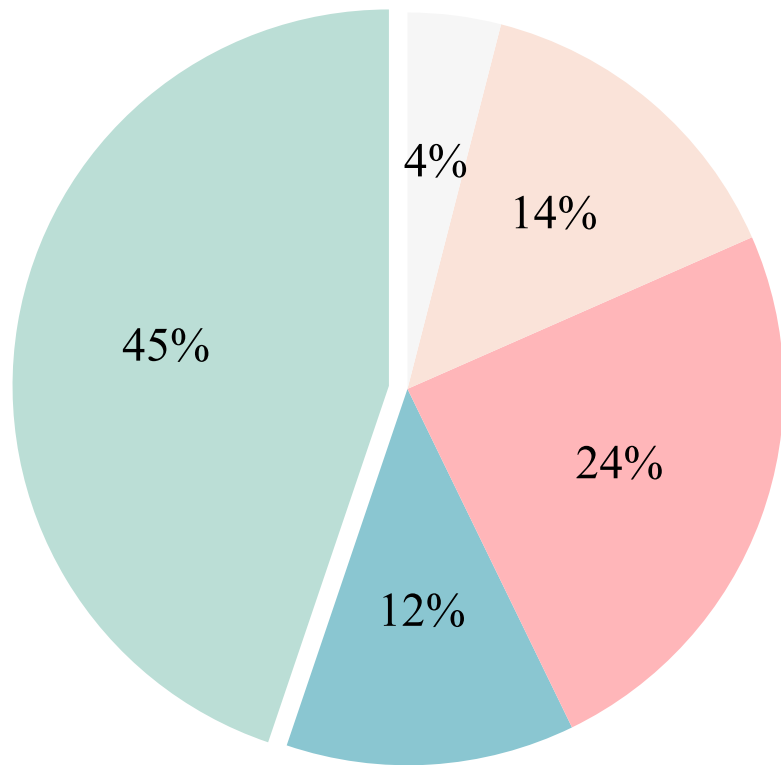

**Ours (3D+2D)**

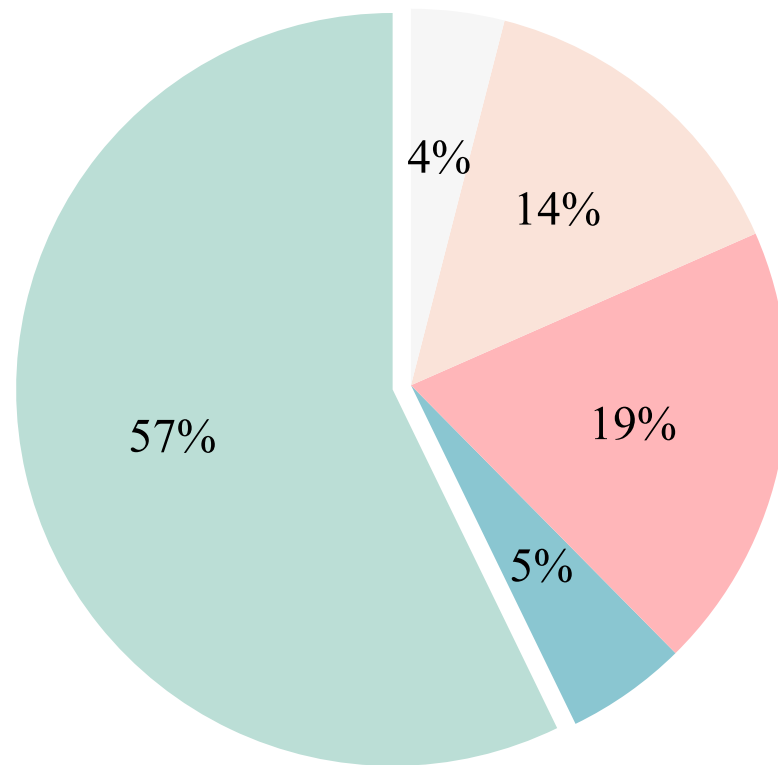

Correct Semantic Spatial Detection Other

Supplement: supplementary_material [file app-error_pie.pdf › supplementary material/fig/app-error_pie.pdf]

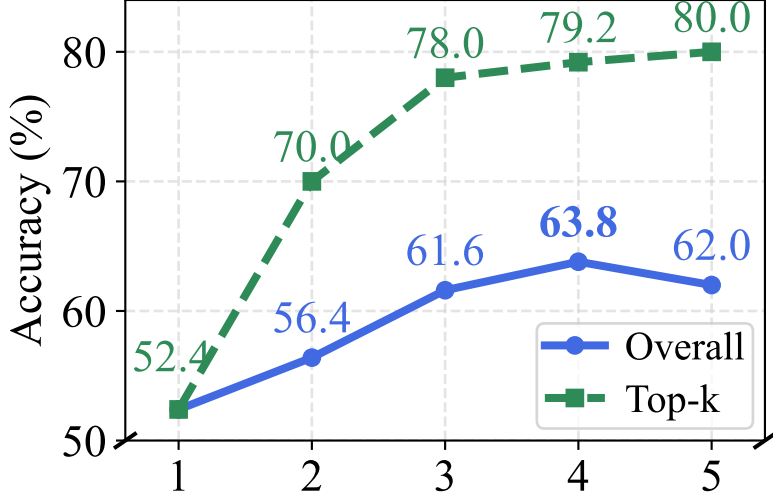

(a) Parameter  $k$  in Top- $k$

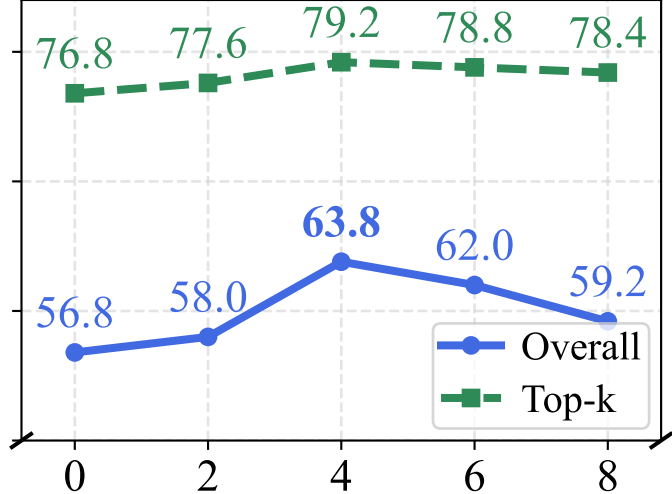

(b) The number of views  $n$

Supplement: supplementary_material [file topk_nview_.pdf › supplementary material/fig/topk_nview_.pdf]
